# Warfarin in haemodialysis patients with atrial fibrillation: what benefit?

Felix Yang<sup>1\*</sup>, Denise Chou<sup>2</sup>, Paul Schweitzer<sup>3</sup>, and Sam Hanon<sup>3</sup>

<sup>1</sup>Division of Cardiology/Arrhythmia Offices Forman 2, Department of Medicine, Montefiore Medical Center, 111 E. 210th Street, Bronx, NY 10467, USA; <sup>2</sup>Department of Neurology, New York Presbyterian Hospital—Cornell, New York, NY, USA; and <sup>3</sup>Division of Cardiology, Department of Medicine, Beth Israel Medical Center, New York, NY, USA

Received 24 July 2010; accepted after revision 19 September 2010; online publish-ahead-of-print 2 November 2010

Warfarin is commonly used to prevent stroke in patients with atrial fibrillation; however, patients on haemodialysis may not derive the same benefit from warfarin as the general population. There are no randomized controlled studies in dialysis patients which demonstrate the efficacy of warfarin in preventing stroke. In fact, warfarin places the dialysis patient at increased risk for haemorrhagic stroke and possibly ischaemic stroke. Additionally, warfarin increases the risk of major bleeding and has been associated with vascular calcification. Routine use of warfarin in dialysis for stroke prevention should be discouraged, and therapy should only be reserved for dialysis patients at high risk for thrombo-embolic stroke and carefully monitored if implemented.

**Keywords** Atrial fibrillation • Haemodialysis • Stroke

## Introduction

Atrial fibrillation is common among haemodialysis patients with a prevalence of 11–27% in cross-sectional studies.<sup>1–3</sup> However, it is not known how the risk of stroke in dialysis patients with atrial fibrillation compares to people not on dialysis. The reported annual rates of stroke vary widely between 1 and 15%.<sup>4–7</sup> Vazquez *et al.*<sup>8</sup> report that the presence of atrial fibrillation increased the risk of stroke in incident dialysis patients 9.8-fold. Despite this seemingly high rate of stroke in atrial fibrillation, ~75% of patients with atrial fibrillation on dialysis are not anticoagulated.<sup>1,9</sup> Here, we review the literature for and against the use of warfarin in haemodialysis patients with atrial fibrillation.

We conducted a literature search of Medline through Ovid (1966 to April 2010). The Medical Subject Heading terms ‘warfarin’, ‘atrial fibrillation’, ‘bleeding’, and ‘stroke’ were combined with ‘end-stage renal disease’, ‘dialysis’, ‘haemodialysis’, and ‘kidney failure’. Additional searches were also conducted for ‘calciophylaxis’ and ‘calcific uraemic arteriopathy.’

## Haemodialysis patients and the baseline risk of bleeding

Patients on dialysis have an increased risk of bleeding at baseline due to multiple factors. There is an acquired defect in primary haemostasis as a result of defects in platelet secretion, aggregation, and

altered interactions between the platelet and vessel walls.<sup>10</sup> In particular, uraemia causes altered arachidonic acid metabolism which leads to a multitude of abnormalities: decreased thromboxane A2 production, abnormal intracellular calcium mobilization, and decreased platelet ADP, epinephrine, and serotonin production. Uraemia also impairs binding between IIb–IIIa receptors and the von Willebrand factor, leading to impaired platelet aggregation.<sup>11</sup> Finally, uraemia results in increased endothelial production of prostaglandin I2 and nitric oxide, agents which have vasodilatory and antiplatelet properties.<sup>10</sup>

Patients with very low GFR or on dialysis are at increased risk for haemorrhagic stroke. In a study by Iseki *et al.*<sup>12</sup> of 1609 patients over 4 years, the relative risk increase in dialysis patients vs. the general population for cerebral haemorrhage was 10.7. The relative risk for subarachnoid bleed was 4.0. Additionally, these bleeds occurred 10 years earlier than in the general population. The Rotterdam Study demonstrated similar increased risks for haemorrhagic stroke.<sup>13</sup> The age- and sex-adjusted hazard ratio for haemorrhagic stroke was 4.1 (95% CI, 1.25–13.42) for the lowest quartile of the estimated GFR (<53.9 mL/min/1.73 m<sup>2</sup> for men; <50.4 mL/min/1.73 m<sup>2</sup> for women) vs. the highest quartile of estimated GFR (>72 mL/min/1.73 m<sup>2</sup> for men; >70.1 mL/min/1.73 m<sup>2</sup> for women). The presumed mechanism is the effect of uraemia on platelet function or perhaps the relationship between GFR and cerebral small-vessel disease.<sup>14</sup> The devastating effects of cerebral haemorrhage are evident in the fact that among

\* Corresponding author. Tel: +1 718 920 7383; fax: +1 646 292 5187, Email: fey2002@gmail.com

Published on behalf of the European Society of Cardiology. All rights reserved. © The Author 2010. For permissions please email: journals.permissions@oxfordjournals.org.

anticoagulated patients in the general population, 76% of patients with intracranial haemorrhage either died or had severe disability at hospital discharge.<sup>15</sup>

The risk of bleeding is not limited to haemorrhagic stroke. In fact, the most serious source of bleeding is gastrointestinal bleeding. It accounts for ~3–7% of all deaths in the dialysis population.<sup>16</sup> The incidence of major bleeding was 2.5% per person-year.<sup>17</sup> In a cross-sectional study of dialysis patients, the prevalence of a history of gastrointestinal bleeding was 24.3%.<sup>18</sup> This may be because dialysis patients are at increased risk for gastrointestinal mucosal abnormalities which are found macroscopically on autopsy in 50% of dialysis patients.<sup>19</sup> Given that most dialysis patients are exposed to anticoagulation of extracorporeal circuit three times a week, the high rate of bleeds is not a surprise. Finally, dialysis patients frequently have an increased need for invasive procedures and therefore are at risk of additional bleeding complications.

## Warfarin in haemodialysis patients with atrial fibrillation

Given that the background rates of bleeding are increased in the dialysis patient, such a patient who has atrial fibrillation presents a treatment dilemma. Do the risks of anticoagulation outweigh its benefits? Importantly, there are no randomized trials conducted of full-intensity anticoagulation for any indication in patients with very low GFR. Dialysis patients were excluded from anticoagulation trials for atrial fibrillation such as the Atrial Fibrillation Follow-up Investigation of Rhythm Management study (AFFIRM) and the Stroke Prevention in Atrial Fibrillation study (SPAF).<sup>20,21</sup>

## Stroke and bleeding risk assessment

The decision to anticoagulate patients for atrial fibrillation is often guided by the CHADS<sub>2</sub> scoring system (Table 1).<sup>22–24</sup> In the general population, treatment with warfarin reduces the annual stroke risk by 50% compared with no treatment.<sup>25</sup> One of the major limitations to the CHADS<sub>2</sub> scoring system is that the majority of patients are classified as intermediate risk, including patients who may actually be at low risk.<sup>26</sup> As a result, a fair number of individuals may be recommended for anticoagulation where there may be little or no benefit. A recent modification to the CHADS<sub>2</sub> scoring system has been proposed by Lip *et al.*<sup>27</sup> to identify patients who are at truly low risk for thrombo-embolism. This scheme, referred to as the CHA<sub>2</sub>DS<sub>2</sub>-VASc scoring system, places weight on major (definitive) risk factors such as prior stroke or TIA and age ≥75, while recognizing the clinically relevant non-major risk factors of heart failure, hypertension, diabetes, and additionally, female gender, age 65–75 years, and atherosclerotic vascular disease (Table 1). These low-risk patients with a CHA<sub>2</sub>DS<sub>2</sub>-VASc score of 0 had a 0% thrombo-embolic rate at 1 year follow-up and thus could be managed with no antithrombotic therapy.<sup>27–29</sup> In the validation population, the CHA<sub>2</sub>DS<sub>2</sub>-VASc scoring system identified ~9% of the patients as being low risk (score = 0).<sup>27</sup> The vast majority of the population had scores of 1 or greater and therefore was recommended anticoagulation therapy.

It should be noted that the CHADS<sub>2</sub> score was developed using data from the Atrial Fibrillation Investigators and SPAF, and validated using the National Registry of Atrial Fibrillation.<sup>22,30</sup> These studies dealt with the general population and not the dialysis population. Similarly, the CHA<sub>2</sub>DS<sub>2</sub>-VASc scoring system was based upon the Euro Heart Survey on Atrial Fibrillation which included

**Table 1** Stroke risk scoring systems

| Scoring system                                          |                                                                                                                                                        | Low-risk score                                                          | Intermediate-risk score                                                   | High-risk score                                                                                        |
|---------------------------------------------------------|--------------------------------------------------------------------------------------------------------------------------------------------------------|-------------------------------------------------------------------------|---------------------------------------------------------------------------|--------------------------------------------------------------------------------------------------------|
| CHADS <sub>2</sub> <sup>22,24</sup>                     | One point each: recent congestive heart failure, hypertension, age over 75, diabetes                                                                   | Score = 0; ischaemic stroke risk/year without treatment: 1.9%           | Score = 1; ischaemic stroke risk/year without treatment: 2.8%             | Score = 2–3; ischaemic stroke risk/year without treatment: 4.0–5.9%                                    |
|                                                         | Two points: history of prior stroke/TIA                                                                                                                | Recommendation: ASA (81–325 mg)                                         | Recommendation: ASA (81–325 mg) or warfarin (INR 2–3)                     | Score = 4–6; ischaemic stroke risk/year without treatment: 8.5%+<br>Recommendation: warfarin (INR 2–3) |
| CHA <sub>2</sub> DS <sub>2</sub> -VASc <sup>27,29</sup> | One point each: congestive heart failure/LV dysfunction, hypertension, diabetes, vascular disease, <sup>a</sup> age 65–74 years, sex category (female) | Score = 0; thrombo-embolic risk/year without treatment: <sup>b</sup> 0% | Score = 1; thrombo-embolic risk/year without treatment: <sup>b</sup> 0.7% | Score = 2–9; thrombo-embolic risk/year without treatment: <sup>b</sup> 1.9%+                           |
|                                                         | Two points each: history of prior age ≥75, stroke/TIA                                                                                                  | Recommendation: no antithrombotic therapy or ASA (81–325mg)             | Recommendation: ASA (81–325 mg) or warfarin (INR 2–3)                     | Recommendation: warfarin (INR 2–3)                                                                     |

<sup>a</sup>Vascular disease = prior MI, peripheral artery disease, aortic plaque.

<sup>b</sup>Theoretical thrombo-embolic rates without therapy corrected for the per cent of patients receiving aspirin within each group, assuming that aspirin provides a 22% reduction in thrombo-embolic risk based upon Hart *et al.*<sup>28</sup> Thrombo-embolism was defined as ischaemic stroke, pulmonary embolism, or peripheral embolism.

renal failure in only 5.8% of its study population, of which dialysis patients were not specifically subcategorized.<sup>31</sup> Application of the CHADS<sub>2</sub> or CHA<sub>2</sub>DS<sub>2</sub>-VASc scoring system to a dialysis patient with atrial fibrillation would result in the recommendation of anticoagulation in the vast majority of cases despite its unproven efficacy in such a population.

The benefit of stroke prevention in any patient is counterbalanced by the risk for haemorrhage. A pooled analysis of five trials with warfarin in atrial fibrillation demonstrated an annual rate of major bleeding of 1.0% in the control patients vs. 1.3% in non-dialysis patients treated with warfarin.<sup>32</sup> The annual rate of intracranial haemorrhage was 0.1% in controls vs. 0.3% in non-dialysis patients treated with warfarin. Determining the risk of bleeding in a dialysis patient on warfarin is difficult. A number of scoring systems have been created to predict bleeding with warfarin treatment (Table 2). However, none of these bleeding risk models were created or validated specifically using a dialysis population.

A bleeding risk model by Shireman et al.<sup>33</sup> incorporates age over 70, female gender, history of bleeding, alcohol/drug abuse, diabetes, anaemia, and antiplatelet use as bleeding risk factors. However, only 0.6% of the development and validation cohorts had a history of hepatic or renal failure. The outpatient bleeding risk index (OBRI) by Beyth et al.<sup>34</sup> incorporates a creatinine >1.5 mg/dL in the index. While ~20% of the derivation and validation population had renal insufficiency (Cr>1.5 mg/dL), patients with end-stage renal disease requiring dialysis were not described. Gage et al.<sup>35</sup> developed the HEMORR<sub>2</sub>HAGES scoring system to predict the risk of major bleeding among patients prescribed warfarin. Renal failure is a recognized risk factor in this classification.

However, this system was developed from the National Registry of Atrial Fibrillation in which only 10% of patients had hepatic or renal failure. Finally, a recent bleeding scoring system developed from the Euro Heart Survey with the acronym HAS-BLED also incorporates renal failure in the score, but it only had a small sample of renal failure patients as mentioned previously.<sup>36</sup>

Barring a bleeding scoring system specifically designed for dialysis patients, the existing risk models do estimate a significant bleeding risk for dialysis patients on warfarin. Using the HAS-BLED system, a dialysis patient would already have a score of 3 for renal disease, anaemia, and labile INR. This would predict 3.7 bleeds per 100 patient-years. Many dialysis patients at baseline have a HEMORR<sub>2</sub>HAGES score of 3 given reduced platelet function, renal disease, and anaemia. This puts the predicted annualized major bleeding rate at a high 8.4%. A similar number is obtained by the OBRI which predicts an annualized major bleeding rate of 8% for patients with just one point for renal insufficiency. One would expect that the existing risk models would underestimate the rates of bleeding in a dialysis population given the increased baseline risk of bleeding as discussed previously. Indeed, observational studies suggest that there is an increased bleeding risk with anticoagulation in this population. According to four cohort studies, rates of major bleeding in dialysis patients with full-intensity anticoagulation is 10–54% per patient year of exposure.<sup>4,37–39</sup> This is at least twice that of dialysis patients not exposed to warfarin.<sup>40</sup> Using retrospective data, Sood et al.<sup>41</sup> developed a modified OBRI which estimates very high rates of bleeding specifically in dialysis patients on warfarin (10% annual risk of bleeding for OBRI score = 0; 32% annual risk of bleeding for OBRI score = 1 or 2; 54% annual risk of bleeding for OBRI score = 3 or 4).<sup>34</sup>

**Table 2** Bleeding risk scoring systems

| Scoring system                                                                                                                                                                                                                                                                                                                                                                | % Annual bleeding risk |                         |                    |
|-------------------------------------------------------------------------------------------------------------------------------------------------------------------------------------------------------------------------------------------------------------------------------------------------------------------------------------------------------------------------------|------------------------|-------------------------|--------------------|
|                                                                                                                                                                                                                                                                                                                                                                               | Low bleed risk         | Medium bleed risk       | High bleed risk    |
| OBRI (outpatient bleeding risk index) <sup>34</sup><br>One point each: age ≥65, history of stroke, history of GI bleed<br>One point (max) for any of the following: recent MI, Hct <30%, Cr >1.5 mg/dL, diabetes                                                                                                                                                              | Score = 0; 3%          | Score = 1–2; 8%         | Score = 3–4; 30%   |
| HEMORR <sub>2</sub> HAGES <sup>35</sup><br>One point each: hepatic or renal disease, ethanol abuse, malignancy, older age (age >75 years), reduced platelet count or function, uncontrolled hypertension, anaemia, genetic factors, excessive fall risk, stroke<br>Two points: rebleeding risk                                                                                | Score = 0–1; ~2–2.5%   | Score = 2–3; ~5–8%      | Score = 4–11; >10% |
| Shireman et al. <sup>33</sup><br>Score = 0.49(X) <sub>Age 70+</sub> + 0.32(X) <sub>Female</sub> + 0.58(X) <sub>Remote bleed</sub> + 0.62(X) <sub>Recent bleed</sub> + 0.71(X) <sub>Alcohol/drug abuse</sub> + 0.27(X) <sub>Diabetes</sub> + 0.86(X) <sub>Anaemia</sub> + 0.32(X) <sub>Antiplatelet</sub><br>X = 1 when the specific characteristic is present and 0 if absent | Score ≤ 1.07; 1%       | 1.07 < score < 2.19; 2% | Score ≥ 2.19; 5%   |
| HAS-BLED <sup>36</sup><br>One point each: hypertension, abnormal renal function, abnormal liver function, stroke, bleeding, labile INRs, elderly age >65, drugs, alcohol                                                                                                                                                                                                      | Score = 1–2; ~1–2%     | Score = 3–4; ~4–9%      | Score = 5–9; >12%  |

**Table 3** Studies of warfarin in dialysis patients with atrial fibrillation

| Study (year, design)                                                 | Number of dialysis patients with AF (no. of patients with AF on warfarin) | Mean follow-up | Major findings                                                                                                                                                                                                                                                    |
|----------------------------------------------------------------------|---------------------------------------------------------------------------|----------------|-------------------------------------------------------------------------------------------------------------------------------------------------------------------------------------------------------------------------------------------------------------------|
| To <i>et al.</i> <sup>9</sup> (2007, retrospective)                  | 40 (10)                                                                   | 26 months      | Cerebrovascular events did not differ between patients with AF from those without AF (5.0%/year vs. 2.4%/year; NS)                                                                                                                                                |
| Genovesi <i>et al.</i> <sup>46</sup> (2008, prospective multicentre) | 127 (31 at enrolment)                                                     | 36 months      | No difference in stroke incidence when comparing an undertreated population of dialysis patients with AF (only 24% of AF patients were on warfarin at enrolment) compared with patients without AF (15.4 vs. 12.4%; $P = 0.4$ ).                                  |
| DOPPS <sup>3</sup> (2010, retrospective)                             | 3245 (509)                                                                | Not reported   | Warfarin use was associated with higher stroke risk; significantly in patients >75 years of age (HR = 2.17; 95% CI 1.04–4.53, $P = 0.04$ ).                                                                                                                       |
| Chan <i>et al.</i> <sup>42</sup> (2010, retrospective)               | 1671 (746)                                                                | 19 months      | Warfarin use increased haemorrhagic stroke risk (1.2%/year among warfarin users vs. 0.5%/year among non-users) and ischaemic stroke risk (5.8%/year among warfarin users vs. 2.3%/year among non-users) without increasing all-cause mortality or hospitalization |

## Warfarin and antiplatelet drugs

When warfarin is combined with antiplatelet agents, the risk of bleeding in dialysis patients is even higher. Since many dialysis patients are already on aspirin for coronary artery disease, the addition of warfarin poses an additive risk. Roughly one-third of dialysis patients are on aspirin.<sup>3,42</sup> Holden *et al.*<sup>17</sup> reported that the incidence of major bleeding on warfarin alone is 3.1% per person-years vs. 4.4% per patient-years on aspirin alone vs. 6.3% per patient-years on warfarin with aspirin. The overwhelming majority of bleeding occurred in the gastrointestinal tract. Although the absolute rates of bleeding vary widely between studies, the combination of warfarin and aspirin places the dialysis patient at high risk for bleeding.

## Warfarin pharmacokinetics

Warfarin use is complicated by a narrow therapeutic index and multiple drug–drug and drug–food interactions. These issues are magnified in the dialysis patient. Patients with severe chronic kidney disease (CKD) (GFR <30 mL/min/1.73 m<sup>2</sup>) require significantly lower warfarin doses. Additionally, they spend less time within their target range and are at a higher risk of over-anticoagulation when compared with patients with no, mild, or moderate CKD.<sup>43</sup> Although warfarin is primarily metabolized by CYP2C9 in the liver, CKD can significantly reduce the non-renal clearance and bioavailability of warfarin.<sup>18</sup> Animal studies have shown that there is a significant 40–85% downregulation of hepatic cytochrome P-450 metabolism in CKD.<sup>44</sup> Dreisbach *et al.*<sup>45</sup> demonstrated a 50% increase in the plasma warfarin S-enantiomer/R-enantiomer ratio among patients with ESRD relative to control subjects, which may reflect a selective decrease in hepatic CYP2C9 activity in renal failure. Since the S-enantiomer of warfarin is five times as powerful as the R-enantiomer, this would explain the lower dosage requirements for warfarin in dialysis patients. Owing to the decrease in CYP2C9 activity in dialysis patients, maintaining a therapeutic range of warfarin may be more difficult, especially when these patients may periodically be

on other medications which inhibit, induce, or compete with CYP2C9 metabolism. Dialysis patients should therefore be monitored more closely while on warfarin therapy.

## Specific studies of warfarin in dialysis patients

Studies specifically dealing with the efficacy of warfarin in dialysis patients with atrial fibrillation are limited (Table 3). In two studies comparing an undertreated population of dialysis patients with atrial fibrillation with patients without atrial fibrillation, there was no difference in stroke incidence.<sup>9,46</sup> Recently, a retrospective cohort analysis of 1671 haemodialysis patients with pre-existing atrial fibrillation suggested that warfarin may actually increase stroke risk.<sup>42</sup> After an average follow-up of 1.6 years, warfarin was noted to double the risk for stroke vs. non-warfarin use. Even patients with the highest CHADS<sub>2</sub> scores or those with a history of stroke or TIA did not benefit from warfarin. An examination of the specific types of strokes encountered in the study reveals that haemorrhagic and, more importantly, ischaemic strokes significantly increased in warfarin users. The crude ischaemic stroke rate among warfarin users was 5.8 strokes per 100 patient-years (95% CI 4.6–7.4) vs. 2.3 strokes per 100 patient-years among non-users (95% CI 1.5–3.6). The crude haemorrhagic stroke rate among warfarin users was 1.2 strokes per 100 patient-years (95% CI 0.7–2.1) vs. 0.5 strokes per 100 patient-years among non-users (95% CI 0.2–1.4). The authors also demonstrated a dose–response relationship between warfarin and new stroke; higher INR levels resulted in a significantly higher stroke risk ( $P = 0.04$  for trend).

Although the study by Chan *et al.* is a retrospective analysis, it raises the possibility that warfarin in dialysis patients puts the patient at increased risk for the outcome we sought to prevent—stroke. No study has subclassified ischaemic stroke into thrombo-embolic, thrombotic, and lacunar infarcts.<sup>47</sup> Given the high rates of hypertension and diabetes in the dialysis population, it is possible that most of the ischaemic strokes in such

patients are small-vessel lacunar infarcts rather than thrombo-embolic in origin.<sup>41</sup> We may be anticoagulating a population where the risk of haemorrhagic stroke may possibly exceed that of a thrombo-embolic event secondary to atrial fibrillation. In addition, warfarin might actually increase the risk of non-thrombo-embolic ischaemic stroke through its possible deleterious effects on vasculature.

The failure of warfarin to prevent strokes was also demonstrated in the observation of 3245 dialysis patients with atrial fibrillation in the Dialysis Outcomes and Practice Patterns Study (DOPPS).<sup>3</sup> In fact, warfarin use was associated with higher stroke risk, particularly in those over 75 years of age. For patients  $\leq 65$  years, the HR = 1.29 (95% CI = 0.45–3.68;  $P = 0.63$ ), for patients 66–75 years, the HR = 1.35 (95% CI = 0.69–2.63;  $P = 0.30$ ), and for patients  $\geq 75$ , the HR = 2.17 (95% CI = 1.04–4.53;  $P = 0.04$ ). Although the study did not discriminate between ischaemic and haemorrhagic strokes and may be confounded (patients received warfarin because they have elevated risk of thrombo-embolic stroke) and/or causal (anticoagulation resulted in higher rates of haemorrhagic stroke), the use of warfarin in this patient population warrants caution as its benefit is uncertain.<sup>3</sup>

We cannot assume that the dialysis patient will derive the same benefit from treatments that have been demonstrated to be beneficial in the general population. This is illustrated in the belief that statins reduce cardiovascular mortality in dialysis patients. Observational studies had suggested that statin therapy reduced mortality in dialysis patients.<sup>48</sup> However, two randomized controlled trials, 4D<sup>49</sup> and AURORA,<sup>50</sup> have failed to demonstrate a significant reduction in cardiovascular endpoints despite reductions in cholesterol in this specific patient population. Recognizing the problem in applying treatments to untested patient populations, there is clearly a need for randomized trials of warfarin in dialysis patients for atrial fibrillation.

Warfarin and vascular calcification

Warfarin has been linked to ectopic calcification, which may adversely affect vascular health. Warfarin, a vitamin K antagonist, prevents the hepatic formation of clotting factors. However, vitamin K-dependent proteins occur in a number of extrahepatic tissues including arterial walls and bone. There is increasing evidence that subclinical deficiency of vitamin K has an effect on bone health and vascular calcification.<sup>51</sup> Warfarin, through its ability to interfere with vitamin K remodelling, is therefore a model of peripheral vitamin K deficiency.<sup>18</sup>

In the hyperphosphataemic environment such as renal failure, vascular smooth muscle cells (VSMCs) have the capacity to transform into osteoblast-like cells capable of producing ectopic bone.<sup>52</sup> These VSMCs initiate and regulate vascular calcification. Matrix Gla protein (MGP) inhibits the calcification process above; however, the protein is activated by a process which requires vitamin K.<sup>53–55</sup> Warfarin therefore may lead to vascular calcification. In the murine model, MGP-deficient mice develop extensive vascular calcification in the aorta and die early from aortic rupture. Administration of vitamin K antagonists in rodents also induces vascular calcification. Even in non-CKD human patients, vitamin K

antagonists significantly increase the prevalence and extent of aortic valve and coronary calcifications.<sup>56</sup>

In dialysis patients, warfarin has been linked to calcific uraemic arteriopathy (calciophylaxis) as well as aortic valve calcification.<sup>57–59</sup> Calcific uraemic arteriopathy occurs in 1–4% of dialysis patients and portends a poor prognosis (45% mortality at 12 months).<sup>60</sup> It is a small- and medium-vessel vasculopathy that involves mural calcification with intimal proliferation, fibrosis, and thrombosis which is usually associated with chronic renal disease and secondary hyperparathyroidism.<sup>61,62</sup> Most often, it affects the skin and leads to non-healing ulcers and subcutaneous calcification; however, it can manifest as a rapidly progressive, cutaneous necrosis, and be seen as extensive calcification of small and medium-sized arteries even on X-ray.<sup>62</sup> Calcific uraemic arteriopathy has also been described in visceral organs such as the heart, lungs, pancreas, intestines, and skeletal muscle. Significant infectious morbidity can be seen within weeks of diagnosis and death commonly results within months due to sepsis or visceral involvement by the vasculopathy.<sup>62</sup> Warfarin is a recognized precipitant of calcific uraemic arteriopathy in addition to other risk factors such as a high calcium-phosphate product, hypercalcaemia, hyperphosphataemia, hyperparathyroidism, low serum albumin, vitamin D treatment, corticosteroids, immunosuppression, diabetes, and dialysis dependency.<sup>62</sup> The dialysis patient is already at increased risk for calciphic uraemic arteriopathy and the addition of warfarin may add additional risk. Recognizing the negative effects of warfarin upon vascular health from animal models and the link between warfarin and calcific uraemic arteriopathy, one might hypothesize that warfarin could induce calcification in cerebral vasculature and perhaps may have a role in the development of stroke in these patients.

Table 4 Risk stratification for warfarin use in stroke prevention in dialysis patients with atrial fibrillation

| Risk stratification              | Description                                                                    |
|----------------------------------|--------------------------------------------------------------------------------|
| Favours warfarin                 | Known atrial thrombus                                                          |
|                                  | Prosthetic heart valve                                                         |
|                                  | CHADS <sub>2</sub> score greater than or equal to the OBRI score by two points |
|                                  | Mitral stenosis                                                                |
|                                  | Previous TIA or stroke                                                         |
|                                  | Patient preference                                                             |
| Favours no warfarin <sup>a</sup> | Age <65 years with no risk factors                                             |
|                                  | Uncontrolled hypertension                                                      |
|                                  | Concurrent antiplatelet use                                                    |
|                                  | History of active calciophylaxis                                               |
|                                  | Previous life-threatening haemorrhage                                          |
|                                  | Severe malnutrition                                                            |
|                                  | Non-compliance                                                                 |
|                                  | Frequent falls                                                                 |

Adapted from Sood et al.<sup>41</sup>  
<sup>a</sup>Consider the use of antiplatelet agents in patients not suitable for warfarin.



## Conclusion

All decisions regarding anticoagulation depend on an assessment of risk and benefit in the individual patient. In the dialysis patient with atrial fibrillation, the risks of warfarin are many and the benefits are unproven. Not only is there a lack of evidence for the efficacy of warfarin in preventing strokes in the dialysis patient with atrial fibrillation, but data show that warfarin increases the risk of haemorrhagic stroke, major gastrointestinal bleed, vascular calcification, and possibly ischaemic stroke. There are certain situations where the decision to start warfarin should be straightforward, such as a patient with a known atrial thrombus or a patient pericardioversion. However, the long-term perceived efficacy of anticoagulation based upon a high CHADS<sub>2</sub> or CHA<sub>2</sub>DS<sub>2</sub>-VASc score, or even prior stroke or TIA in dialysis patients with atrial fibrillation may ultimately prove to be false.

A risk–benefit analysis based on the CHADS<sub>2</sub> or CHA<sub>2</sub>DS<sub>2</sub>-VASc score is simply not applicable in the dialysis patient. Sood *et al.*<sup>41</sup> suggested parameters to help guide the decision between anticoagulating vs. not anticoagulating dialysis patients with atrial fibrillation (Table 4). In the majority of dialysis patients with atrial fibrillation but without multiple compelling risk factors for anticoagulation, the case for avoiding warfarin would be clear. Until we have randomized prospective data to guide our management of such patients, warfarin should only be reserved for those patients at highest risk for thrombo-embolic stroke and the INR should be closely monitored if implemented.

**Conflict of interest:** none declared.

**Authorship:** All authors had access to the data and a role in writing the manuscript.

## References

- Genovesi S, Pogliani D, Faini A, Valsecchi MG, Riva A, Stefani F *et al.* Prevalence of atrial fibrillation and associated factors in a population of long-term hemodialysis patients. *Am J Kidney Dis* 2005;**46**:897–902.
- Atar I, Konas D, Acikel S, Kulah E, Atar A, Bozbas H *et al.* Frequency of atrial fibrillation and factors related to its development in dialysis patients. *Int J Cardiol* 2006;**106**:47–51.
- Wizemann V, Tong L, Satayathum S, Disney A, Akiba T, Fissell RB *et al.* Atrial fibrillation in hemodialysis patients: clinical features and associations with anticoagulant therapy. *Kidney Int* 2010;**77**:1098–106.
- Vazquez E, Sanchez-Perales C, Borrego F, Garcia-Cortes MJ, Lozano C, Guzman M, *et al.* Influence of atrial fibrillation on the morbidity-mortality of patients on hemodialysis. *Am Heart J* 2000;**140**:886–90.
- Vazquez E, Sanchez-Perales C, Lozano C, Garcia-Cortes MJ, Borrego F, Guzman M *et al.* Comparison of prognostic value of atrial fibrillation versus sinus rhythm in patients on long-term hemodialysis. *Am J Cardiol* 2003;**92**:868–71.
- Wiesholzer M, Harm F, Tomasec G, Barbieri G, Putz D, Balcke P. Incidence of stroke among chronic hemodialysis patients with nonrheumatic atrial fibrillation. *Am J Nephrol* 2001;**21**:35–9.
- US Renal Data System: USRDS 2009. Annual Data Report: Atlas of End-Stage Renal Disease in the United States. Bethesda: National Institutes of Health, National Institute of Diabetes and Digestive and Kidney Diseases; 2009.
- Vazquez E, Sanchez-Perales C, Garcia-Garcia F, Castellano P, Garcia-Cortes MJ, Liebana A *et al.* Atrial fibrillation in incident dialysis patients. *Kidney Int* 2009;**76**:324–30.
- To AC, Yehia M, Collins JF. Atrial fibrillation in haemodialysis patients: do the guidelines for anticoagulation apply? *Nephrology (Carlton)* 2007;**12**:441–7.
- Sohal AS, Gangji AS, Crowther MA, Treleven D. Uremic bleeding: pathophysiology and clinical risk factors. *Thromb Res* 2006;**118**:417–22.
- Benigni A, Boccardo P, Galbusera M, Monteagudo J, De Marco L, Remuzzi G *et al.* Reversible activation defect of the platelet glycoprotein IIb–IIIa complex in patients with uremia. *Am J Kidney Dis* 1993;**22**:668–76.
- Iseki K, Kinjo K, Kimura Y, Osawa A, Fukuyama K. Evidence for high risk of cerebral hemorrhage in chronic dialysis patients. *Kidney Int* 1993;**44**:1086–90.
- Bos MJ, Koudstaal PJ, Hofman A, Breteler MM. Decreased glomerular filtration rate is a risk factor for hemorrhagic but not for ischemic stroke: the Rotterdam Study. *Stroke* 2007;**38**:3127–32.
- O'Rourke MF, Safar ME. Relationship between aortic stiffening and microvascular disease in brain and kidney: cause and logic of therapy. *Hypertension* 2005;**46**:200–4.
- Fang MC, Go AS, Chang Y, Hylek EM, Henault LE, Jensvold NG *et al.* Death and disability from warfarin-associated intracranial and extracranial hemorrhages. *Am J Med* 2007;**120**:700–5.
- Boyle JM, Johnston B. Acute upper gastrointestinal hemorrhage in patients with chronic renal disease. *Am J Med* 1983;**75**:409–12.
- Holden RM, Harman GJ, Wang M, Holland D, Day AG. Major bleeding in hemodialysis patients. *Clin J Am Soc Nephrol* 2008;**3**:105–10.
- Holden RM, Clase CM. Use of warfarin in people with low glomerular filtration rate or on dialysis. *Semin Dial* 2009;**22**:503–11.
- Chachati A, Godon JP. Effect of haemodialysis on upper gastrointestinal tract pathology in patients with chronic renal failure. *Nephrol Dial Transplant* 1987;**1**:233–7.
- Wyse DG, Waldo AL, DiMarco JP, Domanski MJ, Rosenberg Y, Schron EB *et al.* A comparison of rate control and rhythm control in patients with atrial fibrillation. *N Engl J Med* 2002;**347**:1825–33.
- Stroke Prevention in Atrial Fibrillation Investigators. Stroke Prevention in Atrial Fibrillation Study. Final results. *Circulation* 1991;**84**:527–39.
- Gage BF, Waterman AD, Shannon W, Boechler M, Rich MW, Radford MJ. Validation of clinical classification schemes for predicting stroke: results from the National Registry of Atrial Fibrillation. *JAMA* 2001;**285**:2864–70.
- Estes NA 3rd, Halperin JL, Calkins H, Ezekowitz MD, Gitman P, Go AS *et al.* ACC/AHA/Physician Consortium 2008 Clinical Performance Measures for Adults with Nonvalvular Atrial Fibrillation or Atrial Flutter: a report of the American College of Cardiology/American Heart Association Task Force on Performance Measures and the Physician Consortium for Performance Improvement (Writing Committee to Develop Clinical Performance Measures for Atrial Fibrillation) developed in collaboration with the Heart Rhythm Society. *J Am Coll Cardiol* 2008;**51**:865–84.
- Fuster V, Ryden LE, Cannom DS, Crijns HJ, Curtis AB, Ellenbogen KA *et al.* ACC/AHA/ESC 2006 Guidelines for the Management of Patients with Atrial Fibrillation: a report of the American College of Cardiology/American Heart Association Task Force on Practice Guidelines and the European Society of Cardiology Committee for Practice Guidelines (Writing Committee to Revise the 2001 Guidelines for the Management of Patients With Atrial Fibrillation): developed in collaboration with the European Heart Rhythm Association and the Heart Rhythm Society. *Circulation* 2006;**114**:e257–354.
- Hylek EM, Go AS, Chang Y, Jensvold NG, Henault LE, Selby JV *et al.* Effect of intensity of oral anticoagulation on stroke severity and mortality in atrial fibrillation. *N Engl J Med* 2003;**349**:1019–26.
- Karthikeyan G, Eikelboom JW. The CHADS<sub>2</sub> score for stroke risk stratification in atrial fibrillation—friend or foe? *Thromb Haemostasis*; **104**:45–8.
- Lip GY, Nieuwlaet R, Pisters R, Lane DA, Crijns HJ. Refining clinical risk stratification for predicting stroke and thromboembolism in atrial fibrillation using a novel risk factor-based approach: the Euro Heart Survey on Atrial Fibrillation. *Chest* 2010;**137**:263–72.
- Hart RG, Pearce LA, Aguilar MI. Meta-analysis: antithrombotic therapy to prevent stroke in patients who have nonvalvular atrial fibrillation. *Ann Intern Med* 2007;**146**:857–67.
- Lip GY, Halperin JL. Improving stroke risk stratification in atrial fibrillation. *Am J Med* 2010;**123**:484–8.
- Atrial Fibrillation Investigators. Risk factors for stroke and efficacy of antithrombotic therapy in atrial fibrillation. Analysis of pooled data from five randomized controlled trials. *Arch Intern Med* 1994;**154**:1449–57.
- Nieuwlaet R, Capucci A, Camm AJ, Olsson SB, Andresen D, Davies DW *et al.* Atrial fibrillation management: a prospective survey in ESC member countries: the Euro Heart Survey on Atrial Fibrillation. *Eur Heart J* 2005;**26**:2422–34.
- Schulman S, Beyth RJ, Kearon C, Levine MN. Hemorrhagic complications of anticoagulant and thrombolytic treatment: American College of Chest Physicians Evidence-Based Clinical Practice Guidelines (8th edition). *Chest* 2008;**133**:257S–98S.

33. Shireman TI, Mahnken JD, Howard PA, Kresowik TF, Hou Q, Ellerbeck EF. Development of a contemporary bleeding risk model for elderly warfarin recipients. *Chest* 2006;**130**:1390–6.
34. Beyth RJ, Quinn LM, Landefeld CS. Prospective evaluation of an index for predicting the risk of major bleeding in outpatients treated with warfarin. *Am J Med* 1998;**105**:91–9.
35. Gage BF, Yan Y, Milligan PE, Waterman AD, Culverhouse R, Rich MW et al. Clinical classification schemes for predicting hemorrhage: results from the National Registry of Atrial Fibrillation (NRAF). *Am Heart J* 2006;**151**:713–9.
36. Pisters R, Lane DA, Nieuwlaat R, de Vos CB, Crijns HJ, Lip GY. A novel user-friendly score (HAS-BLED) to assess one-year risk of major bleeding in atrial fibrillation patients: The Euro Heart Survey. *Chest* 2010;**138**:1093–100.
37. Biggers JA, Remmers AR Jr, Glassford DM, Sarles HE, Lindley JD, Fish JC. The risk of anticoagulation in hemodialysis patients. *Nephron* 1977;**18**:109–13.
38. O'Shea SI, Lawson JH, Reddan D, Murphy M, Ortel TL. Hypercoagulable states and antithrombotic strategies in recurrent vascular access site thrombosis. *J Vasc Surg* 2003;**38**:541–8.
39. LeSar CJ, Merrick HW, Smith MR. Thrombotic complications resulting from hypercoagulable states in chronic hemodialysis vascular access. *J Am Coll Surg* 1999;**189**:73–9; discussion 9–81.
40. Elliott MJ, Zimmerman D, Holden RM. Warfarin anticoagulation in hemodialysis patients: a systematic review of bleeding rates. *Am J Kidney Dis* 2007;**50**:433–40.
41. Sood MM, Komenda P, Sood AR, Rigatto C, Buetti J. The intersection of risk and benefit: is warfarin anticoagulation suitable for atrial fibrillation in patients on hemodialysis? *Chest* 2009;**136**:1128–33.
42. Chan KE, Lazarus JM, Thadhani R, Hakim RM. Warfarin use associates with increased risk for stroke in hemodialysis patients with atrial fibrillation. *J Am Soc Nephrol* 2009;**20**:2223–33.
43. Limdi NA, Beasley TM, Baird MF, Goldstein JA, McGwin G, Arnett DK et al. Kidney function influences warfarin responsiveness and hemorrhagic complications. *J Am Soc Nephrol* 2009;**20**:912–21.
44. Dreisbach AW, Lertora JJ. The effect of chronic renal failure on drug metabolism and transport. *Expert Opin Drug Metab Toxicol* 2008;**4**:1065–74.
45. Dreisbach AW, Japa S, Gebrekale AB, Mowry SE, Lertora JJ, Kamath BL et al. Cytochrome P4502C9 activity in end-stage renal disease. *Clin Pharmacol Ther* 2003;**73**:475–7.
46. Genovesi S, Vincenti A, Rossi E, Pogliani D, Acquistapace I, Stella A et al. Atrial fibrillation and morbidity and mortality in a cohort of long-term hemodialysis patients. *Am J Kidney Dis* 2008;**51**:255–62.
47. Seliger SL, Gillen DL, Longstreth WT Jr, Kestenbaum B, Stehman-Breen CO. Elevated risk of stroke among patients with end-stage renal disease. *Kidney Int* 2003;**64**:603–9.
48. Shurraw S, Tonelli M. AURORA: is there a role for statin therapy in dialysis patients? *Am J Kidney Dis* 2003;**41**:237–40.
49. Wanner C, Krane V, Marz W, Olschewski M, Mann JF, Ruf G et al. Atorvastatin in patients with type 2 diabetes mellitus undergoing hemodialysis. *N Engl J Med* 2005;**353**:238–48.
50. Fellstrom BC, Jardine AG, Schmieder RE, Holdaas H, Bannister K, Beutler J et al. Rosuvastatin and cardiovascular events in patients undergoing hemodialysis. *N Engl J Med* 2009;**360**:1395–407.
51. Holden RM, Booth SL. Vascular calcification in chronic kidney disease: the role of vitamin K. *Nat Clin Pract Nephrol* 2007;**3**:522–3.
52. El-Abbadi M, Giachelli CM. Mechanisms of vascular calcification. *Adv Chronic Kidney Dis* 2007;**14**:54–66.
53. Spronk HM, Soute BA, Schurgers LJ, Cleutjens JP, Thijssen HH, De Mey JG et al. Matrix Gla protein accumulates at the border of regions of calcification and normal tissue in the media of the arterial vessel wall. *Biochem Biophys Res Commun* 2001;**289**:485–90.
54. Shearer MJ, Bach A, Kohlmeier M. Chemistry, nutritional sources, tissue distribution and metabolism of vitamin K with special reference to bone health. *J Nutr* 1996;**126**:1181S–6S.
55. Jin DY, Tie JK, Stafford DW. The conversion of vitamin K epoxide to vitamin K quinone and vitamin K quinone to vitamin K hydroquinone uses the same active site cysteines. *Biochemistry* 2007;**46**:7279–83.
56. Koos R, Mahnken AH, Muhlenbruch G, Brandenburg V, Pflueger B, Wildberger JE et al. Relation of oral anticoagulation to cardiac valvular and coronary calcium assessed by multislice spiral computed tomography. *Am J Cardiol* 2005;**96**:747–9.
57. Streit M, Paredes BE, Ruegger S, Brand CU. Typical features of calciphylaxis in a patient with end-stage renal failure, diabetes mellitus and oral anticoagulation. *Dermatology* 2000;**200**:356–9.
58. Rudwaleit M, Schwarz A, Trautmann C, Offermann G, Distler A. Severe calciphylaxis in a renal patient on long-term oral anticoagulant therapy. *Am J Nephrol* 1996;**16**:344–8.
59. Pineo GF, Hull RD. Adverse effects of coumarin anticoagulants. *Drug Saf* 1993;**9**:263–71.
60. Fine A, Zacharias J. Calciphylaxis is usually non-ulcerating: risk factors, outcome and therapy. *Kidney Int* 2002;**61**:2210–7.
61. Arseculeratne G, Evans AT, Morley SM. Calciphylaxis—a topical overview. *J Eur Acad Dermatol Venereol* 2006;**20**:493–502.
62. Wilmer WA, Magro CM. Calciphylaxis: emerging concepts in prevention, diagnosis, and treatment. *Semin Dial* 2002;**15**:172–86.
